# Supplementary material for: Antibacterial, Antifungal, Antiviral, and Anthelmintic Activities of Medicinal Plants of Nepal Selected Based on Ethnobotanical Evidence
Source: Hindawi journal article supplement (doi:10.1155/2020/1043471), 2020-01-01
Supplement: f1 [file 1043471.f1.pdf]

## *Supplementary Material*

### **Antibacterial, Antifungal, Antiviral and Anthelmintic Activities of medicinal Plants of Nepal selected based on Ethnobotanical Evidence**

Bishnu Joshi<sup>1,2\*‡</sup>, Sujogya Kumar Panda<sup>3\*‡</sup>, Ramin Saleh Jouneghani<sup>1</sup>, Maoxuan Liu<sup>1</sup>, Niranjan Parajuli<sup>4</sup>, Pieter Leyssen<sup>5</sup>, Johan Neyts<sup>5</sup>, Walter Luyten<sup>3</sup>

#### **Supplementary Data (photographs of TLC of crude extracts)**

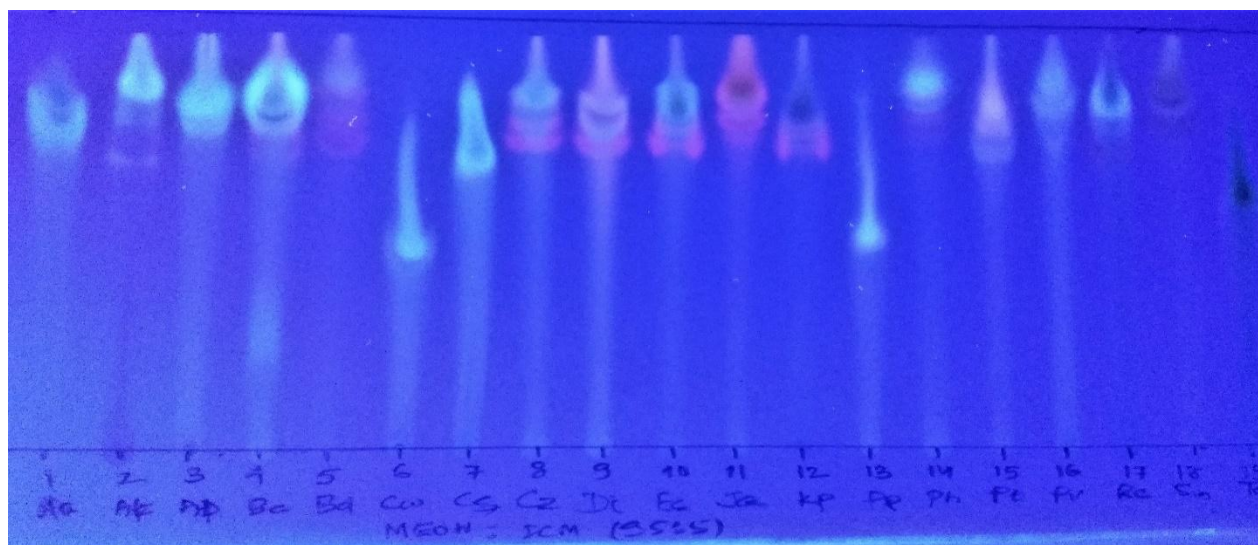

Figure 1: TLC of crude extracts exposed to UV at 360 nm; mobile phase: methanol:dichloromethane (95:5, v/v)

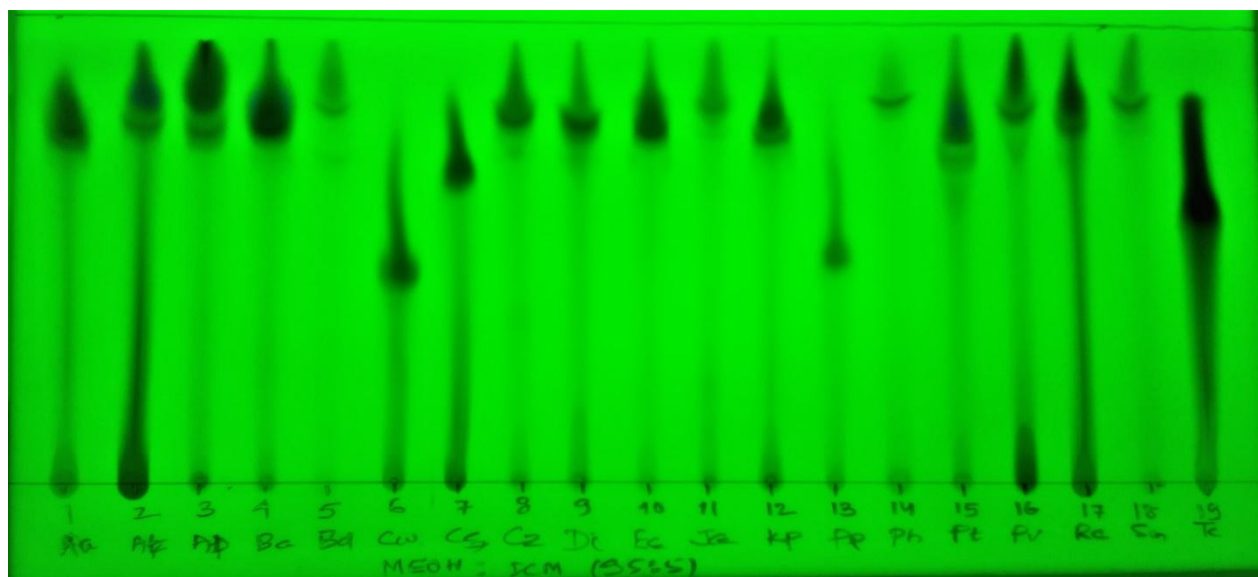

Figure 2: TLC of crude extracts exposed to UV at 254 nm; mobile phase: methanol:dichloromethane (95:5, v/v)

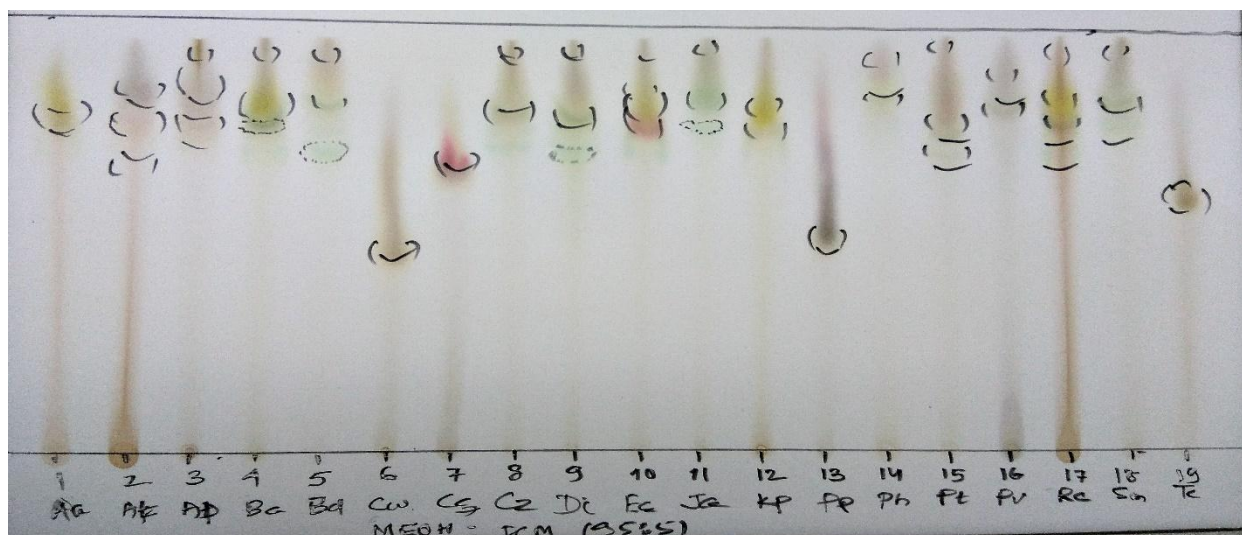

Figure 3: TLC of crude extracts after spraying with 5% sulphuric acid

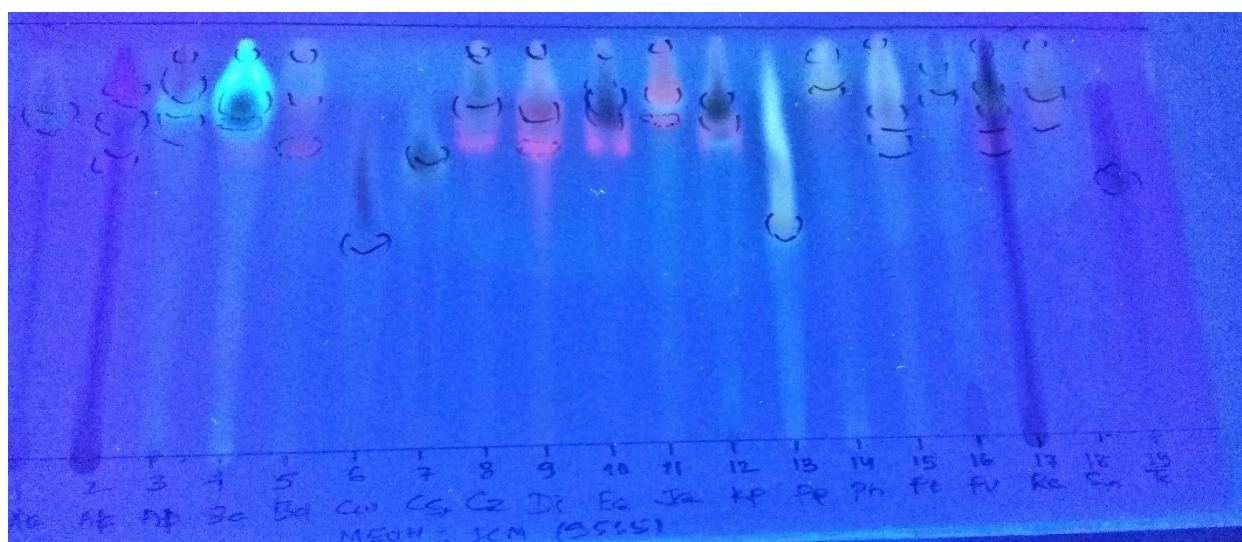

Figure 4: TLC of crude extracts exposed to UV at 360 nm after spraying with 5% sulphuric acid

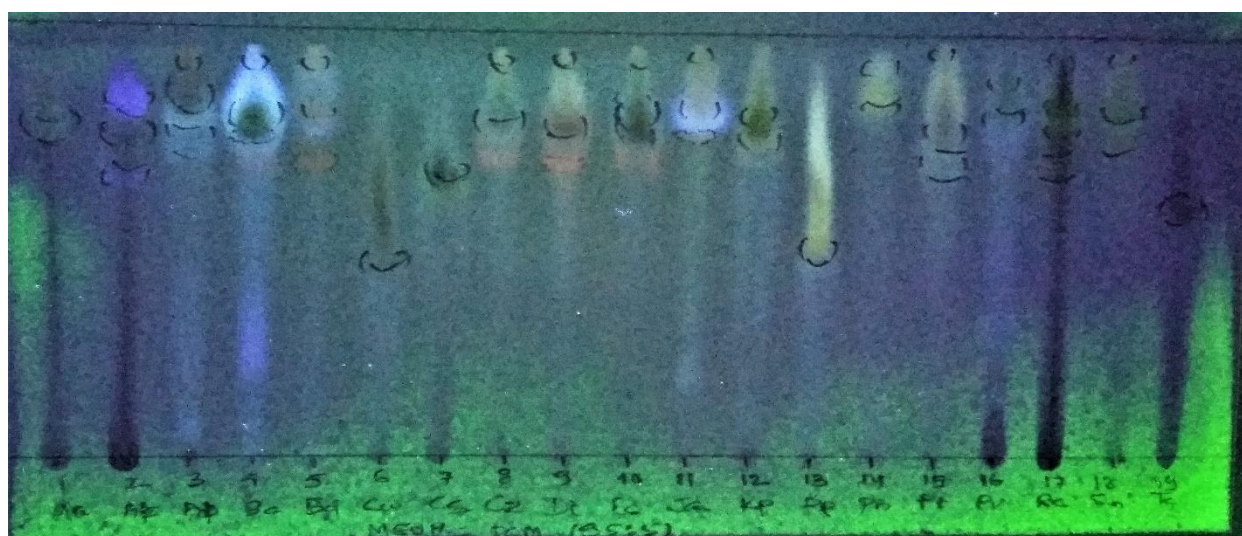

Figure 5: TLC of crude extracts exposed to UV at 254 nm after spraying with 5% sulphuric acid



Table 1: Interpretation of TLC results of crude extracts

| Plant name                        | R <sub>f</sub> at 254 nm | R <sub>f</sub> at 254 nm after exposure to 5% sulphuric acid | R <sub>f</sub> at 360 nm | R <sub>f</sub> at 360 nm after exposure to 5% sulphuric acid | Appearance after exposure to 5% sulphuric acid | Possible phytochemical group(s) |
|-----------------------------------|--------------------------|--------------------------------------------------------------|--------------------------|--------------------------------------------------------------|------------------------------------------------|---------------------------------|
| <i>Aleuritopteris anceps</i>      | 0.8-Blue                 | 0.8-Yellow                                                   | 0.8-Brown                | 0.8-Yellow                                                   | 0.8-Light yellow                               | Coumarins                       |
|                                   | –                        | –                                                            | –                        | 0.82-Pink                                                    | Brown                                          | Flavonoids                      |
| <i>Ampelocissus tomentosa</i>     | 0.82-Blue                | 0.82-Blue                                                    | 0.82-Blue                | 0.82-Blue                                                    | 0.82-Gray                                      | Coumarins                       |
|                                   | –                        | –                                                            | 0.75-Blue                | 0.75-Brown                                                   | –                                              | Polyphenols                     |
|                                   | –                        | –                                                            | –                        | 0.77-Blue                                                    | –                                              | –                               |
| <i>Boenninghausenia albiflora</i> | 0.82-Blue                | 0.82-Blue                                                    | 0.82-Blue                | 0.82-Blue                                                    | 0.82- Gray green                               | Coumarins                       |
|                                   | 0.77-Light brown         | 0.77-Yellow                                                  | 0.77-Brown               | 0.77-Purple                                                  | 0.77-Light yellow                              | Flavonoids                      |
|                                   | –                        | 0.29-Blue                                                    | 0.29-Brown               | 0.29-Blue                                                    | –                                              | Sterols and glycosides          |
| <i>Boerhavia diffusa</i>          | 0.8-Red                  | 0.8-Red                                                      | 0.8-Red                  | 0.8-Yellow                                                   | 0.8-Light green                                | Flavonoids or steroids          |
|                                   | 0.69-Purple              | 0.69-Purple                                                  | 0.69-Red                 | 0.69-Yellow                                                  | 0.69-Green                                     | Terpenoids                      |
| <i>Cirsium wallichii</i>          | 0.47-Yellow              | –                                                            | 0.47-Blue                | 0.47-Blue                                                    | 0.47-Grey                                      | Alkaloids                       |
| <i>Clerodendrum serratum</i>      | 0.75-Light purple        | –                                                            | 0.66-Blue                | 0.66-Brown surrounded by blue                                | 0.66-Brown                                     | Sterols and glycosides          |
| <i>Cynoglossum zeylanicum</i>     | –                        | –                                                            | 0.69-Red                 | 0.69-Pink                                                    | 0.69– Light green                              | Saponins                        |
|                                   | –                        | –                                                            | 0.77-Blue                | 0.77-Yellow                                                  | –                                              | –                               |
|                                   | 0.8-Purple               | 0.8-Pink                                                     | –                        | –                                                            | 0.8-Light green                                | Sesquiterpene lactones          |
| <i>Dichrocephala integrifolia</i> | –                        | –                                                            | 0.85-Orange              | 0.85-Yellow                                                  | –                                              | Flavonoids                      |
|                                   | 0.69-Yellow              | 0.69-Pink                                                    | 0.69-Red                 | 0.69-Pink                                                    | 0.69-Green                                     | Saponins                        |
|                                   | 0.8-Purple               | –                                                            | 0.8-Blue                 | 0.8-Brown                                                    | 0.8-Light purple                               | Sterols and glycosides          |
|                                   | –                        | –                                                            | 0.9-Orange               | 0.9-Yellow                                                   | –                                              | Flavonoids                      |

|                                  |                  |             |             |             |                   |                           |
|----------------------------------|------------------|-------------|-------------|-------------|-------------------|---------------------------|
| <i>Ehretia acuminata</i>         | –                | –           | 0.75-Red    | 0.75-Pink   | 0.75– Light green | Saponins                  |
|                                  | –                | 0.8-Pink    | 0.8-Blue    | 0.8-Brown   | 0.8-Brown         | Polyphenols               |
|                                  | –                | –           | 0.82-Orange | 0.82-Yellow | –                 | Saponins                  |
|                                  | 0.85-Blue        | –           | –           | –           | 0.85-Light yellow | –                         |
| <i>Justicia adhatoda</i>         | –                | –           | 0.75-Red    | 0.75-Pink   | 0.75– Light green | Saponins                  |
|                                  | –                | 0.8-Pink    | 0.8-Blue    | 0.8-Blue    | –                 | Flavonoids or polyphenols |
|                                  | 0.85-Purple      | 0.85-Blue   | 0.85-Orange | –           | 0.85-Green        | Alkaloids                 |
| <i>Kalanchoe pinnata</i>         | 0.77-Yellow      | –           | 0.77-Red    | 0.77-Brown  | –                 | Flavonoids or polyphenols |
|                                  | –                | –           | –           | –           | 0.82-Light yellow | Saponins                  |
| <i>Paris polyphylla</i>          | 0.5-Yellow       | –           | 0.5-Blue    | 0.5-Yellow  | 0.5-Gray          | Alkaloids                 |
| <i>Parthenium hysterophorus</i>  | 0.86-Light green | 0.86-Yellow | 0.86-Red    | 0.86-Brown  | 0.86-Light green  | Flavonoids or polyphenols |
|                                  | –                | –           | 0.9-Orange  | 0.9-Yellow  | –                 | Flavonoids                |
| <i>Pedilanthus tithymaloides</i> | –                | 0.69-Blue   | 0.69-Pink   | 0.69-Red    | 0.69-Gray         | Sterols and glycosides    |
|                                  | –                | 0.74-Blue   | 0.74-Purple | 0.74-Brown  | 0.74-Light green  | Polyphenols               |
|                                  | –                | –           | 0.9-Orange  | 0.9-Yellow  | –                 | Flavonoids                |
| <i>Phragmites vallatoria</i>     | –                | 0.8-Red     | 0.8-Yellow  | 0.8-Yellow  | –                 | Flavonoids                |
|                                  | –                | 0.85-Yellow | 0.85-Blue   | 0.85-Brown  | 0.85-Gray         | Polyphenols               |
| <i>Rhododendron arboreum</i>     | –                | 0.8-Pink    | 0.8-Pink    | 0.8-Red     | 0.8-Light purple  | Tannins                   |
|                                  | –                | 0.82-Yellow | 0.82-Blue   | 0.82-Red    | 0.82-Yellow       | Flavonoids                |
|                                  | –                | –           | 0.9-Orange  | 0.9-Yellow  | –                 | Flavonoids                |
| <i>Sapindus mukorossi</i>        | –                | 0.73-Brown  | 0.73-Red    | 0.73-Pink   | –                 | Flavonoids or polyphenols |
|                                  | –                | 0.8-Purple  | 0.8-Yellow  | 0.8-Pink    | –                 | Flavonoids or polyphenols |
|                                  | –                | –           | –           | –           | 0.85-Light green  | Saponins                  |
| <i>Terminalia chebula</i>        | 0.64-Blue        | –           | 0.64-Yellow | 0.64-Blue   | 0.64-Gray         | Coumarins                 |

---
